# Supplementary material for: 3‴-O-Foliamenthoyl-Rutin, a New Flavonoid Glycoside from the Roots of Nymphoides peltata
Source: MDPI journal article supplement (doi:10.3390/plants12244083), 2023-12-06

# Supplementary Materials

## 3'''-O-Foliamenthoyl-Rutin, a New Flavonoid Glycoside from the Roots of *Nymphoides peltata*

Tae-Young Kim <sup>1,†</sup>, Bum Soo Lee <sup>2,†</sup>, Beom-Geun Jo <sup>1,†</sup>, Seong Pil Heo <sup>3</sup>, Min-Ji Keem <sup>1</sup>,  
Taek-Hwan Kwon <sup>1</sup>, Su-Nam Kim <sup>3,4,\*</sup>, Ki Hyun Kim <sup>2,\*</sup> and Min Hye Yang <sup>1,\*</sup>

<sup>1</sup> Department of Pharmacy, College of Pharmacy and Research Institute for Drug Development, Pusan National University, Busan 46241, Republic of Korea; taeyour@pusan.ac.kr (T.-Y.K.); bg\_jo@pusan.ac.kr (B.-G.J.); mj\_keem@pusan.ac.kr (M.-J.K.); thkwon@pusan.ac.kr (T.-H.K.)

<sup>2</sup> School of Pharmacy, Sungkyunkwan University, Suwon 16419, Republic of Korea; kosboybs@skku.edu

<sup>3</sup> Natural Products Research Institute, Korea Institute of Science and Technology, Gangneung 25451, Republic of Korea; 123045@kist.re.kr

<sup>4</sup> Division of Bio-Medical Science and Technology, KIST School, University of Science and Technology, Seoul 02792, Republic of Korea

\* Correspondence: snkim@kist.re.kr (S.-N.K.); khkim83@skku.edu (K.H.K.); mhyang@pusan.ac.kr (M.H.Y.); Tel.: +82-31-290-7700 (K.H.K.)

† These authors contributed equally to this study.

## Contents of Supplementary material

**Table S1.**  $^1\text{H}$  and  $^{13}\text{C}$  NMR Spectrum Data of Compounds **1-5**

**Figure S1.** HR-ESI-MS data of **6**

**Figure S2.**  $^1\text{H}$  NMR spectrum of **6** in  $\text{DMSO-}d_6$  (500 MHz)

**Figure S3.**  $^{13}\text{C}$  NMR spectrum of **6** in  $\text{DMSO-}d_6$  (100 MHz)

**Figure S4.**  $^1\text{H}$ - $^1\text{H}$  COSY spectrum of **6** in  $\text{DMSO-}d_6$

**Figure S5.** HSQC spectrum of **6** in  $\text{DMSO-}d_6$

**Figure S6.** HMBC spectrum of **6** in  $\text{DMSO-}d_6$

**Figure S7.** UV/PDA spectrum of **6**

**Table S1.** <sup>1</sup>H and <sup>13</sup>C NMR Spectrum Data of Compounds **1-5**

| Position | Compound <b>1</b>              |                                   | Compound <b>2</b>              |                                   | Compound <b>3</b>              |                                   | Compound <b>4</b>              |                                         | Compound <b>5</b>              |                                   |
|----------|--------------------------------|-----------------------------------|--------------------------------|-----------------------------------|--------------------------------|-----------------------------------|--------------------------------|-----------------------------------------|--------------------------------|-----------------------------------|
|          | $\delta_c$ , type <sup>c</sup> | $\delta_H$ (J in Hz) <sup>b</sup> | $\delta_c$ , type <sup>c</sup> | $\delta_H$ (J in Hz) <sup>a</sup> | $\delta_c$ , type <sup>c</sup> | $\delta_H$ (J in Hz) <sup>a</sup> | $\delta_c$ , type <sup>c</sup> | $\delta_H$ (J in Hz) <sup>a</sup>       | $\delta_c$ , type <sup>c</sup> | $\delta_H$ (J in Hz) <sup>a</sup> |
| 2        | 145.9 C                        |                                   | 156.6 C                        |                                   | 156.8 C                        |                                   | 156.8 C                        |                                         | 159.1 C                        |                                   |
| 3        | 134.8 C                        |                                   | 134.1 C                        |                                   | 133.8 C                        |                                   | 133.8 C                        |                                         | 135.7 C                        |                                   |
| 4        | 174.9 C                        |                                   | 177.2 C                        |                                   | 177.9 C                        |                                   | 177.8 C                        |                                         | 179.8 C                        |                                   |
| 5        | 159.8 C                        |                                   | 157.3 C                        |                                   | 161.7 C                        |                                   | 161.7 C                        |                                         | 163.6 C                        |                                   |
| 6        | 102.1 CH                       | 6.16 (d, 2.0)                     | 100.6 CH                       | 6.15 (d, 2.0)                     | 99.2 CH                        | 6.20 (d, 2.0)                     | 99.2 CH                        | 6.14 (d, 2.0)                           | 101.1 CH                       | 6.15 (d, 2.0)                     |
| 7        | 163.0 C                        |                                   | 161.6 C                        |                                   | 164.8 C                        |                                   | 164.7 C                        |                                         | 166.7 C                        |                                   |
| 8        | 92.4 CH                        | 6.38 (d, 2.0)                     | 94.8 CH                        | 6.34 (d, 2.0)                     | 94.0 CH                        | 6.40 (d, 2.0)                     | 94.0 CH                        | 6.34 (d, 2.0)                           | 96.0 CH                        | 6.34 (d, 2.0)                     |
| 9        | 155.2 C                        |                                   | 156.6 C                        |                                   | 156.6 C                        |                                   | 156.8 C                        |                                         | 158.8 C                        |                                   |
| 10       | 97.3 C                         |                                   | 102.4 C                        |                                   | 104.4 C                        |                                   | 104.5 C                        |                                         | 106.3 C                        |                                   |
| 1'       | 121.0 C                        |                                   | 121.5 C                        |                                   | 122.1 C                        |                                   | 122.1 C                        |                                         | 123.5 C                        |                                   |
| 2'       | 114.7 CH                       | 7.65 (d, 2.0)                     | 115.9 CH                       | 7.49 s                            | 116.7 CH                       | 7.61-7.53 (m)                     | 116.6 CH                       | 7.53 (s)                                | 118.7 CH                       | 7.49 (s)                          |
| 3'       | 144.1 C                        |                                   | 146.1 C                        |                                   | 145.3 C                        |                                   | 145.3 C                        |                                         | 147.2 C                        |                                   |
| 4'       | 146.8 C                        |                                   | 146.1 C                        |                                   | 149.0 C                        |                                   | 149.0 C                        |                                         | 150.9 C                        |                                   |
| 5'       | 114.7 CH                       | 6.86 (d, 8.5)                     | 115.9 CH                       | 6.80 (d, 8.0)                     | 115.7 CH                       | 6.84 (d, 9.0)                     | 115.8 CH                       | 6.81 (d, 9.0)                           | 117.7 CH                       | 6.80 (d, 8.0)                     |
| 6'       | 119.1 CH                       | 7.52 (dd, 8.5, 2.0)               | 121.5 CH                       | 7.50 (d, 8.0)                     | 121.6 CH                       | 7.61-7.53 (m)                     | 121.6 CH                       | 7.54 (d, 2.0)                           | 124.0 CH                       | 7.51 (d, 2.0)                     |
| 1''      |                                |                                   | 102.2 CH                       | 5.30 (d, 7.5)                     | 101.4 CH                       | 5.46 (d, 7.5)                     | 101.3 CH                       | 5.33 (d, 7.5)                           | 103.6 CH                       | 5.30 (d, 7.5)                     |
| 2''      |                                |                                   | 70.8 CH                        | 4.90 (m)                          | 74.6 CH                        | 3.03 (m)                          | 72.9 CH                        | 2.92 (m)                                | 76.5 CH                        | 3.18 (m)                          |
| 3''      |                                |                                   | 71.0 CH                        | 3.99 (m)                          | 78.11 CH                       | 3.21 (m)                          | 77.4 CH                        | 3.25 (m)                                | 78.9 CH                        | 3.17 (m)                          |
| 4''      |                                |                                   | 71.7 CH                        | 3.52 (m)                          | 70.4 CH                        | 3.17 (m)                          | 70.5 CH                        | 3.04 (m)                                | 72.4 CH                        | 3.30 (m)                          |
| 5''      |                                |                                   | 70.6 CH                        | 3.22 (m)                          | 77.0 CH                        | 3.04 (m)                          | 76.8 CH                        | 3.18 (m)                                | 78.3 CH                        | 3.20 (m)                          |
| 6''      |                                |                                   | 18.0 CH <sub>3</sub>           | 0.95 (d, 6.0)                     | 61.5 CH <sub>2</sub>           | 3.58 (d, 11.5),<br>3.28 (overlap) | 67.7 CH <sub>2</sub>           | 3.73 (d, 11.0),<br>3.41 (overlap)       | 69.4 CH <sub>2</sub>           | 3.66 (d, 10.0),<br>3.24 (overlap) |
| 1'''     |                                |                                   |                                |                                   |                                |                                   | 103.2 CH                       | 3.91 (d, 6.5)                           | 103.2 CH                       | 4.34 (d, 1.5)                     |
| 2'''     |                                |                                   |                                |                                   |                                |                                   | 70.9 CH                        | 3.10 (m)                                | 70.7 CH                        | 3.23 (m)                          |
| 3'''     |                                |                                   |                                |                                   |                                |                                   | 74.4 CH                        | 3.19 (m)                                | 74.3 CH                        | 3.03 (m)                          |
| 4'''     |                                |                                   |                                |                                   |                                |                                   | 67.8 CH                        | 3.36 (m)                                | 72.9 CH                        | 3.25 (m)                          |
| 5'''     |                                |                                   |                                |                                   |                                |                                   | 65.3 CH <sub>2</sub>           | 3.42 (overlap),<br>2.85 (dd, 12.0, 2.0) | 72.8 CH                        | 3.36 (m)                          |
| 6'''     |                                |                                   |                                |                                   |                                |                                   |                                |                                         | 20.2 CH <sub>3</sub>           | 0.95 (d, 6.0)                     |

<sup>a</sup> Measured at 400 MHz in DMSO-*d*<sub>6</sub>. <sup>b</sup> Measured at 500 MHz in DMSO-*d*<sub>6</sub>. <sup>c</sup> Measured at 100 MHz in DMSO-*d*<sub>6</sub>.

Figure S1. HR-ESI-MS data of 6

**Compound Identification Results: Cpd 663: C37 H44 O18; 4.612**

ID Techniques Applied: MFG

| Best | Name | Formula     | m/z      | Mass     | Species                                | Diff (ppm) | RT    | Score |
|------|------|-------------|----------|----------|----------------------------------------|------------|-------|-------|
| ⊙    |      | C37 H44 O18 | 777.2561 | 776.251  | (M+H) <sup>+</sup> (M+Na) <sup>+</sup> | -2.29      | 4.612 | 94.7  |
| ○    |      | C44 H40 O13 | 777.2561 | 776.251  | (M+H) <sup>+</sup> (M+Na) <sup>+</sup> | 5.23       | 4.612 | 76.14 |
| ○    |      | C26 H48 O26 | 777.2561 | 776.2499 | (M+H) <sup>+</sup>                     | 8.41       | 4.612 | 56.61 |

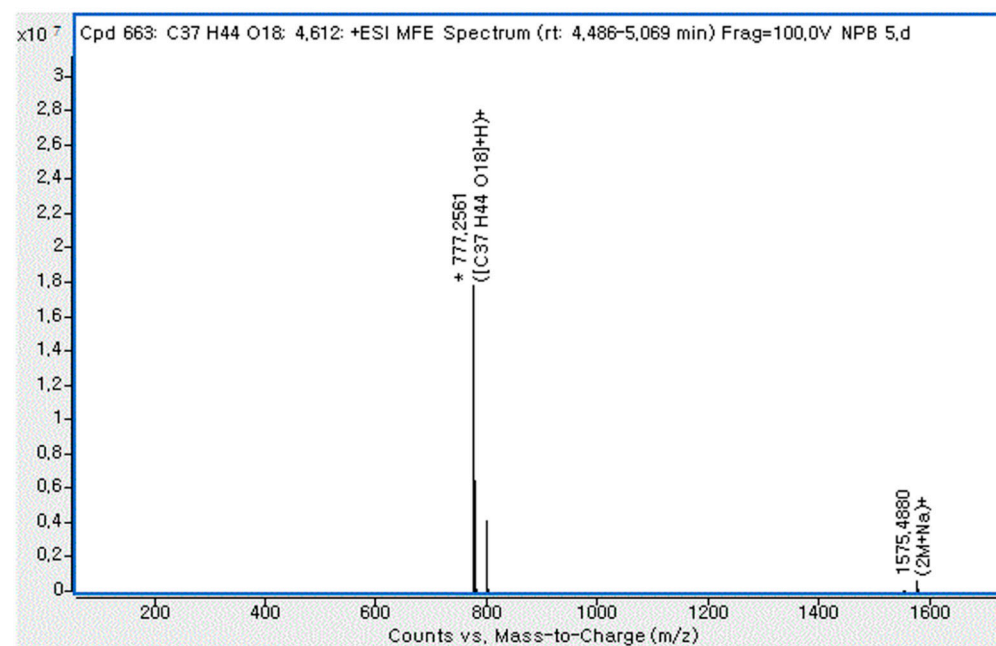

**Figure S2.**  $^1\text{H}$  NMR spectrum of **6** in  $\text{DMSO-}d_6$  (500 MHz)

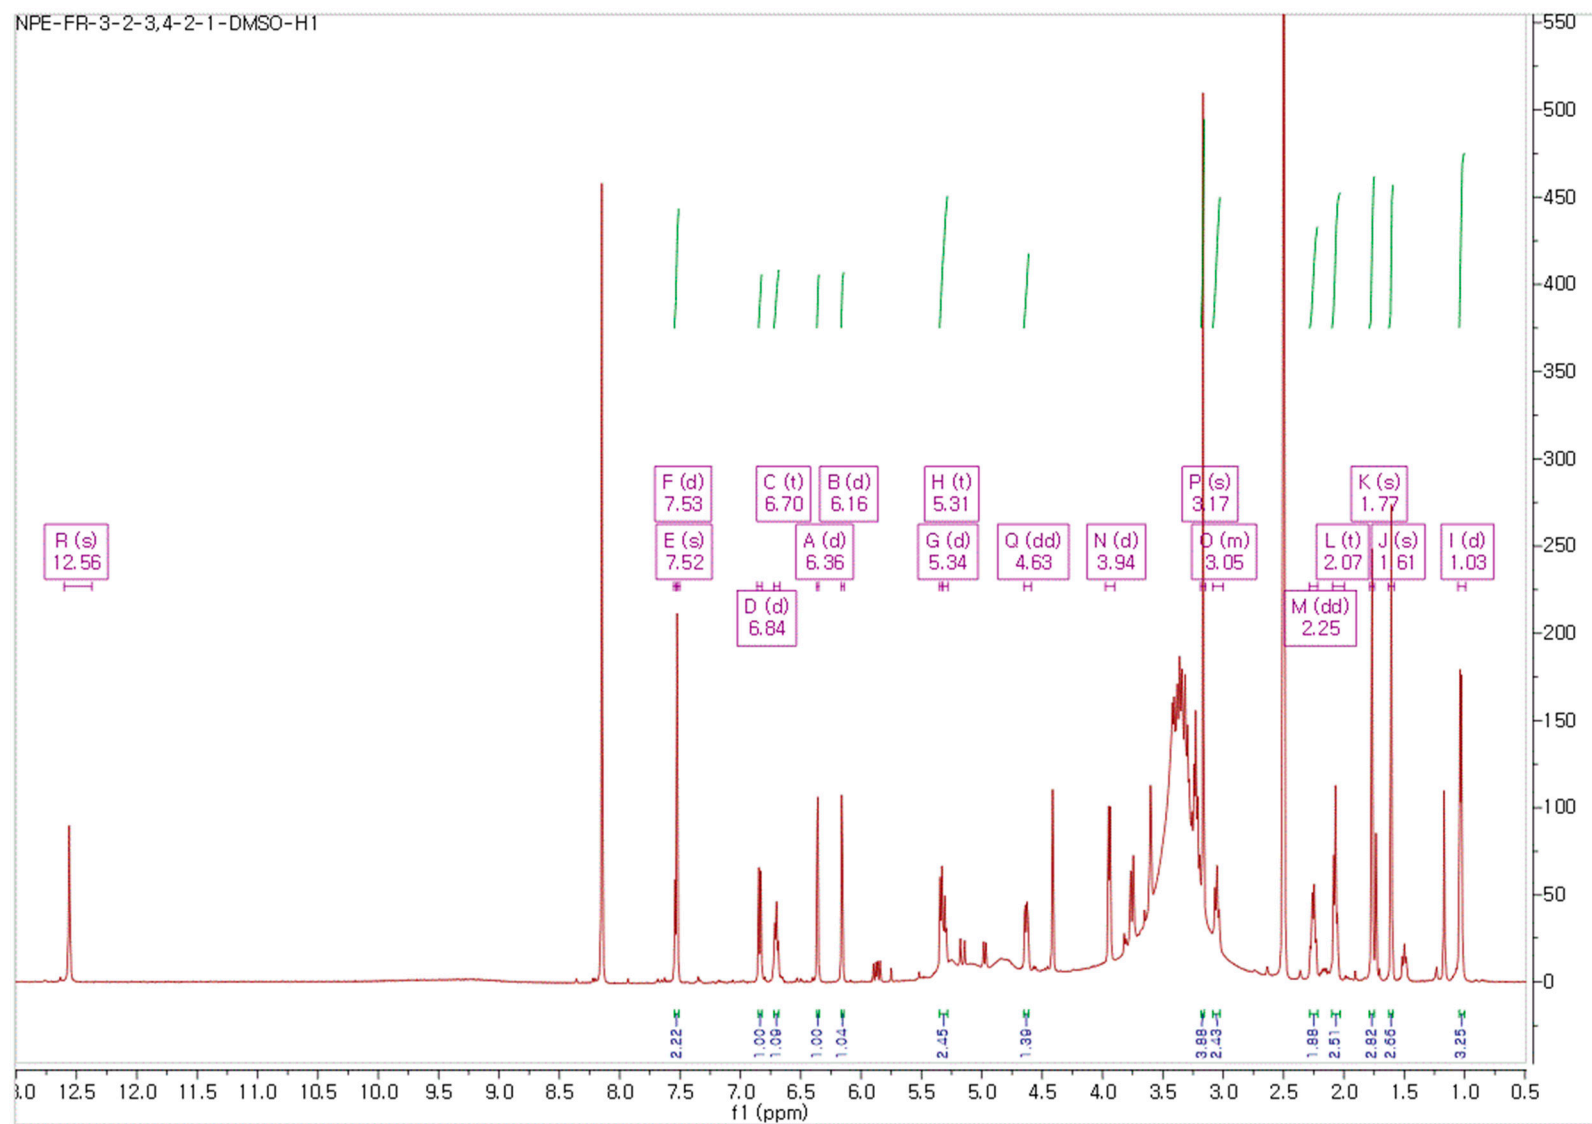

**Figure S3.**  $^{13}\text{C}$  NMR spectrum of **6** in  $\text{DMSO}-d_6$  (100 MHz)

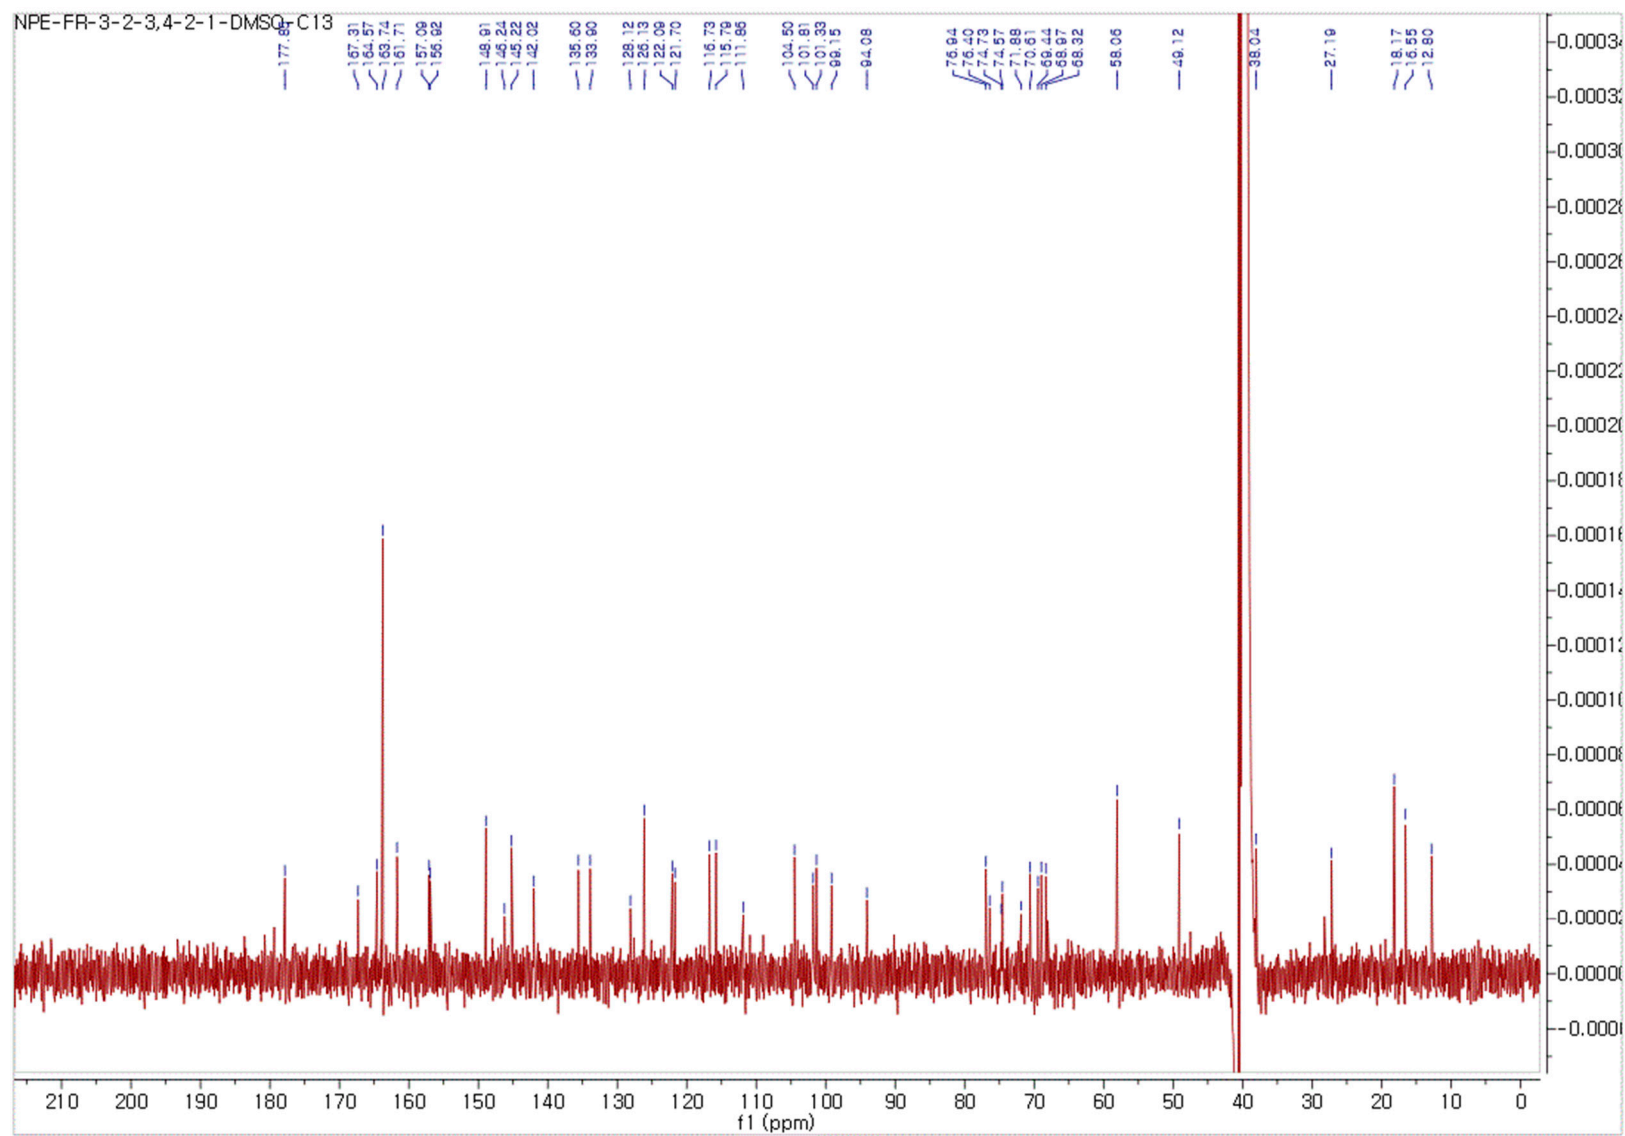

**Figure S4.**  $^1\text{H}$ - $^1\text{H}$  COSY spectrum of **6** in  $\text{DMSO-}d_6$

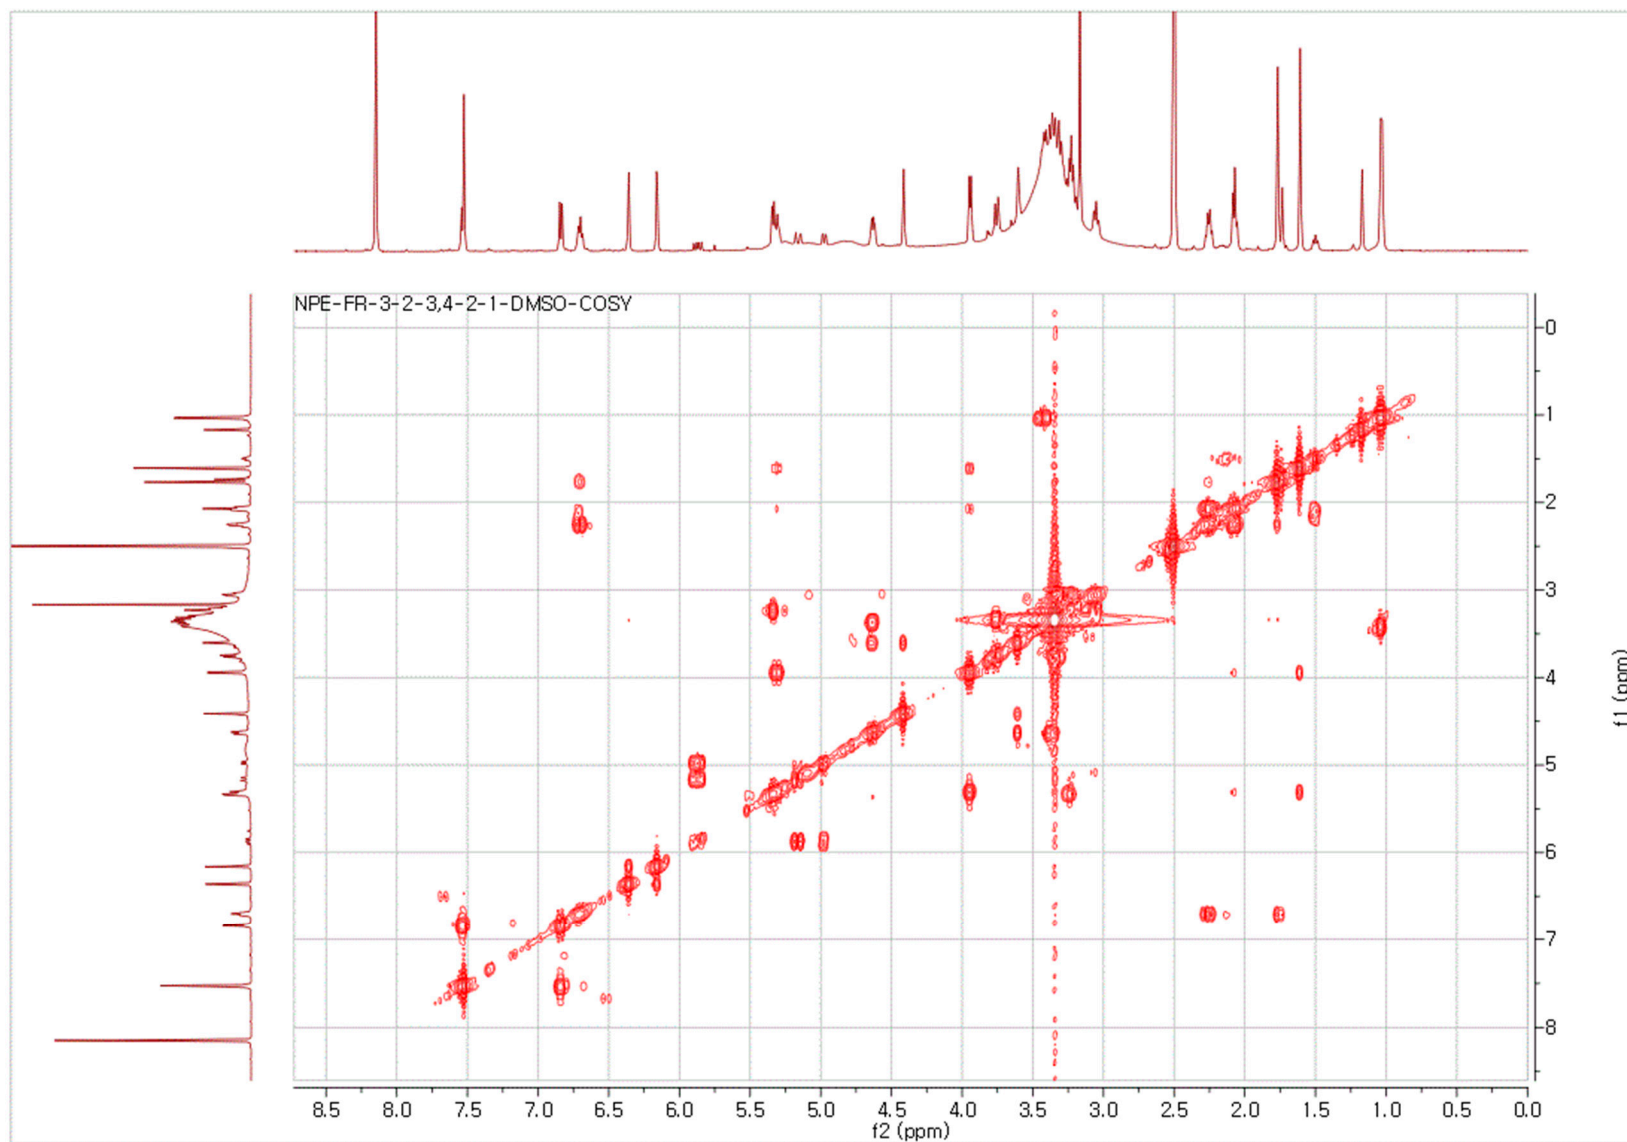



**Figure S5.** HSQC spectrum of **6** in DMSO- $d_6$

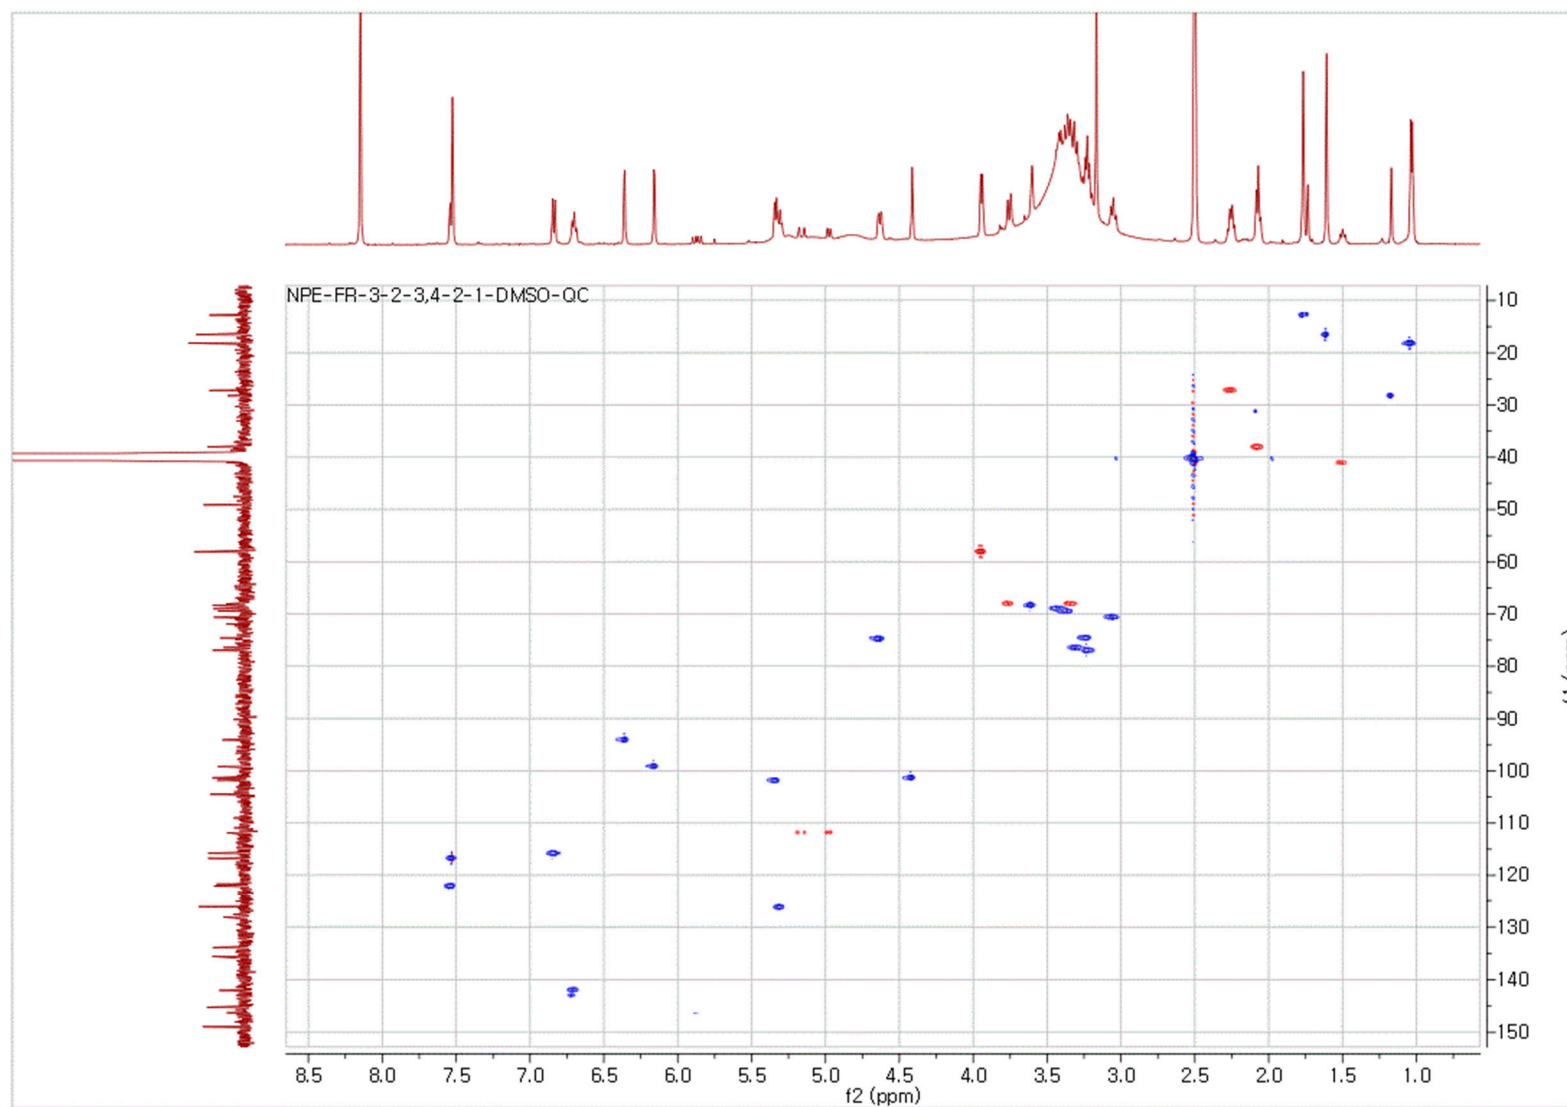



**Figure S6.** HMBC spectrum of **6** in DMSO- $d_6$

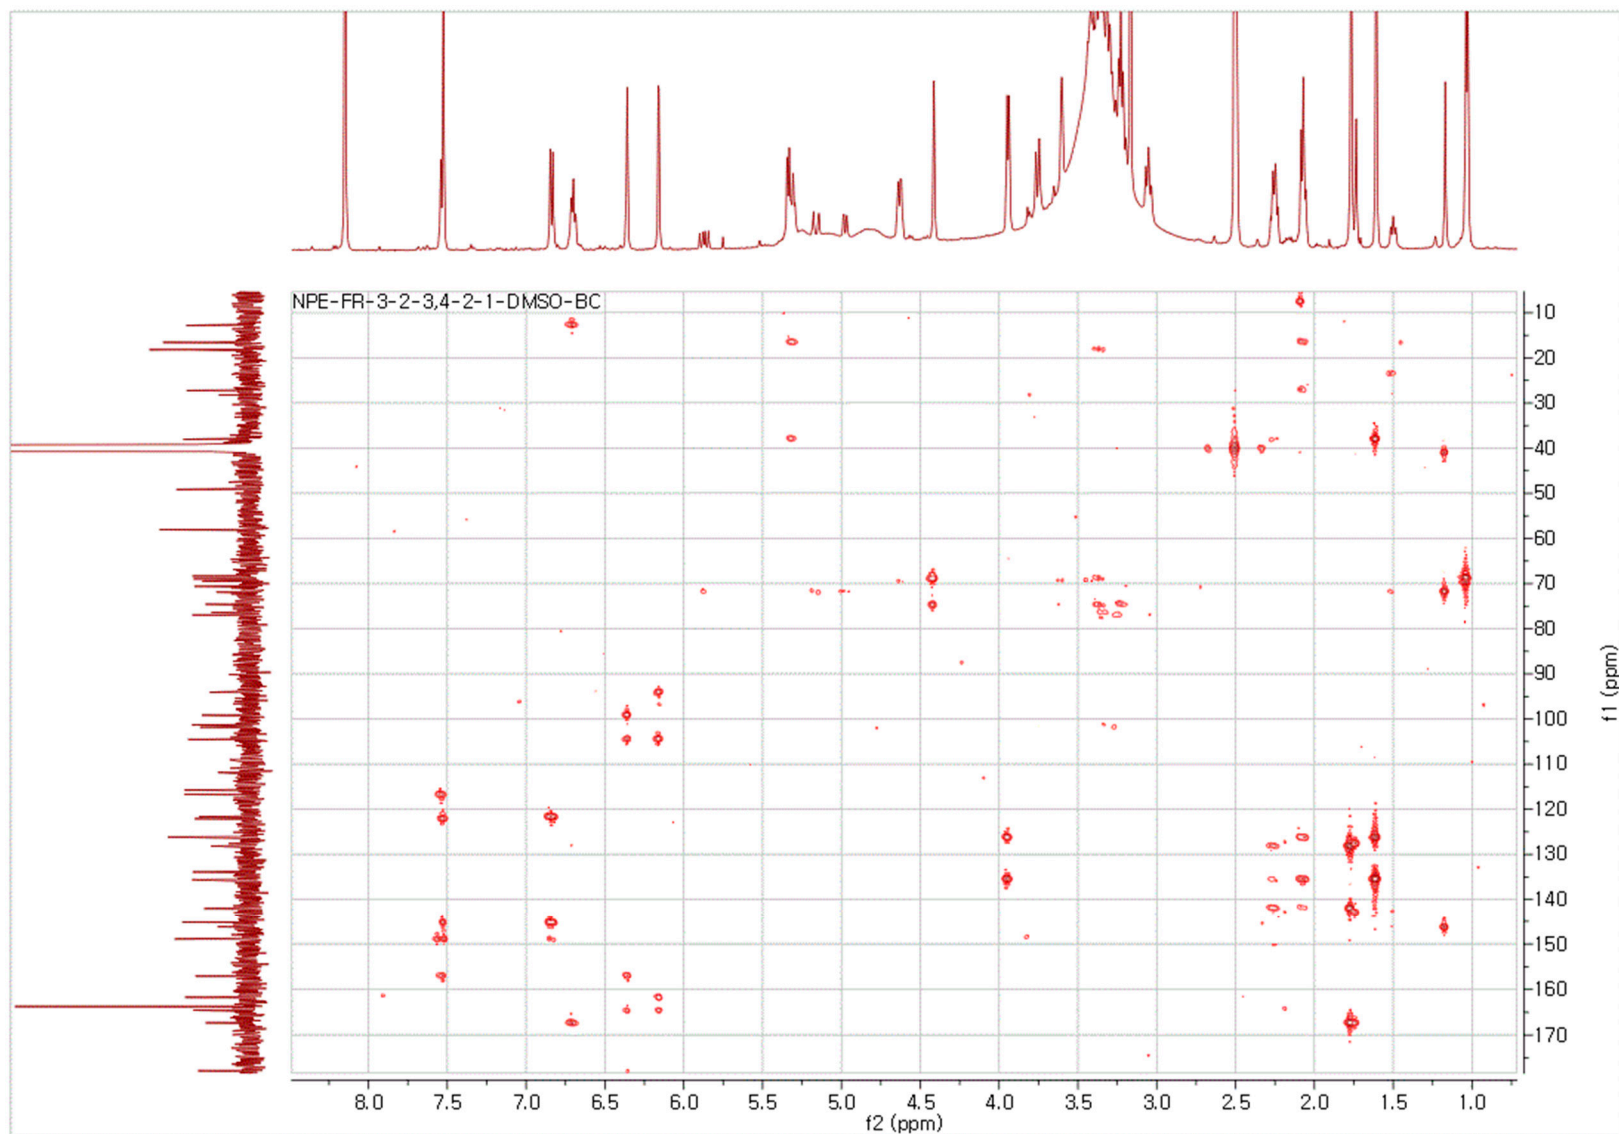

**Figure S7.** UV/PDA spectrum of **6**

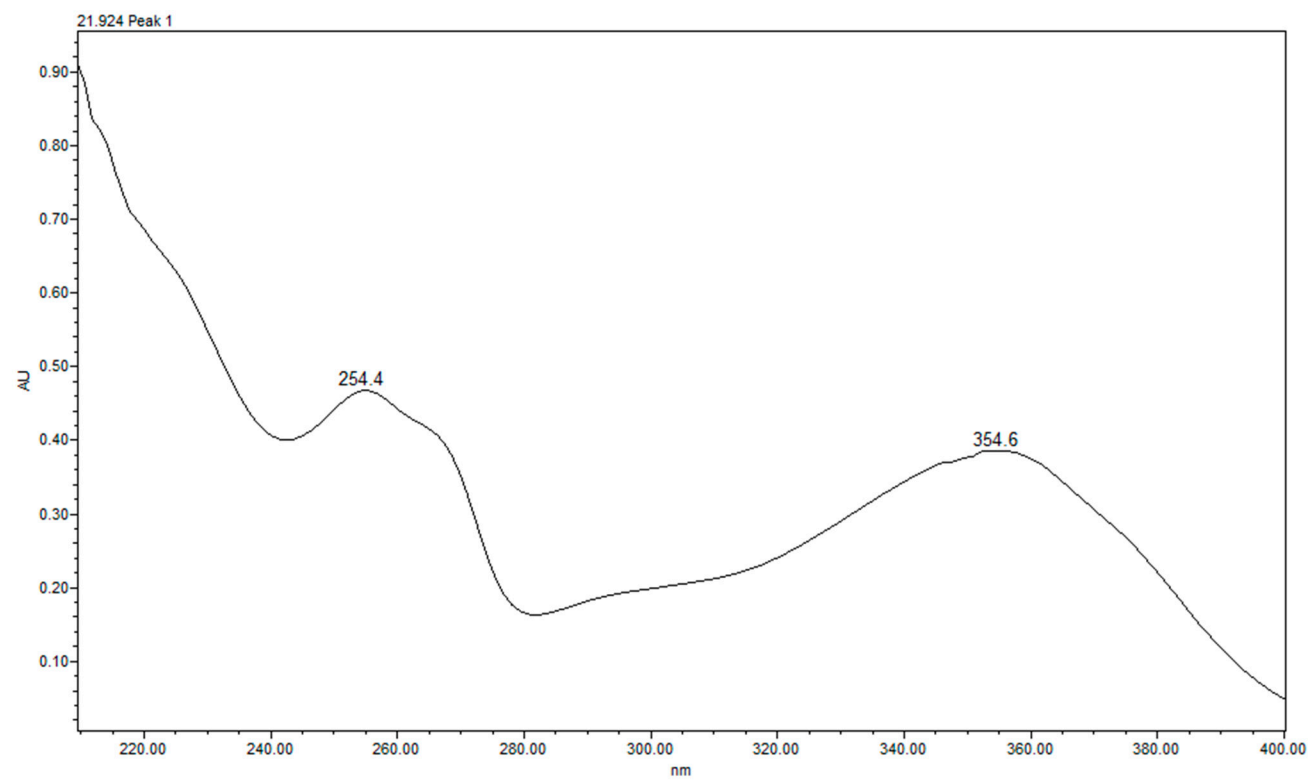

Supplement: s1 [file s1]
